# Supplementary material for: Label-free technology for the amplified detection of microRNA based on the allosteric hairpin DNA switch and hybridization chain reaction
Source: Royal Society of Chemistry journal article supplement (doi:10.1039/c4an01178c), 2014-01-01
Supplement: c4an01178c1.pdf [file c4an01178c1.pdf]

# Label-Free Technology for the Amplified Detection of MicroRNA Based on the Allosteric Hairpin DNA Switch and Hybridization Chain Reaction

Sheng Cai, Zhijuan Cao, Chaiwan Lau, and Jianzhong Lu\*

Received (in XXX, XXX) Xth XXXXXXXXXX 20XX, Accepted Xth XXXXXXXXXX 20XX

DOI: 10.1039/b000000x

**Table S1.** DNA and RNA sequences used in this work.

| Name                 | Sequence                                                                                            |
|----------------------|-----------------------------------------------------------------------------------------------------|
| Hairpin DNA          | 5'-ATTGACCGCTGTGTGACGCAACACTCAATAACTATAACAACCT<br>ACTACCTCAGTTATTGAGTGTTTCGATTCGGCGTG-3'            |
| C1-let7              | 5'-AGTGTTCGATTCGGCGTGGGTTAACACGCCGAATCGAACACT<br>CAATAAC-3'                                         |
| C2-let7              | 5'-TTAACCCACGCCGAATCGAACACTGTTATTGAGTGTTTCGATT<br>CGGCGTG-3'                                        |
| Hairpin DNA-G5       | 5'-ATTGACCGCTGTGTGACGCAACACTCAATAACTATAACAACCT<br>ACTACCTCAGTTATTGAGTGTTACTAGGATTCGGCGTG-3'         |
| C1-let7-G5           | 5'-TTACTAGGATTCGGCGTGGGTTAACACGCCGAATCCTAGTAA<br>CACTCA-3'                                          |
| C2-let7-G5           | 5'-TTAACCCACGCCGAATCCTAGTAATGAGTGTTACTAGGATTC<br>GGCGTG-3'                                          |
| Hairpin DNA-G13      | 5'-ATTGACCGCTGTGTGACGCAACACTCAATAACTATAACAACCT<br>ACTACCTCAGTTATTGAGTGTTCAAAGTAGTCTAGGATTCGGCGTG-3' |
| C1-let7-G13          | 5'-AGTCTAGGATTCGGCGTGGGTTAACACGCCGAATCCTAGACT<br>ACTTTG-3'                                          |
| C2-let7-G13          | 5'-TTAACCCACGCCGAATCCTAGACTCAAAGTAGTCTAGGATTC<br>GGCGTG-3'                                          |
| let-7 a              | 5'-UGAGGUAGUAGGUUGUAUAGUU-3'                                                                        |
| let-7 b              | 5'-UGAGGUAGUAGGUUGUGUGGUU-3'                                                                        |
| let-7 c              | 5'-UGAGGUAGUAGGUUGUAUGGUU-3'                                                                        |
| let-7 d              | 5'-AGAGGUAGUAGGUUGCAGUAGU-3'                                                                        |
| let-7 e              | 5'-UGAGGUAGGAGGUUGUAUAGU-3'                                                                         |
| let-7 f              | 5'-UGAGGUAGUAGAUUGUAUAGUU-3'                                                                        |
| let-7 g              | 5'-UGAGGUAGUAGUUUGUACAGU-3'                                                                         |
| let-7 i              | 5'-UGAGGUAGUAGUUUGUGCUGUU-3'                                                                        |
| Hairpin DNA-miRNA 21 | 5'-ATTGACCGCTGTGTGACGCAACACTCAATTCAACATCAGTCTG<br>ATAAGCTATGAATTGAGTGTTACTAGGATTCGGCGTG-3'          |
| miRNA 21             | 5'-UAGCUUAUCAGACUGAUGUUGA-3'                                                                        |

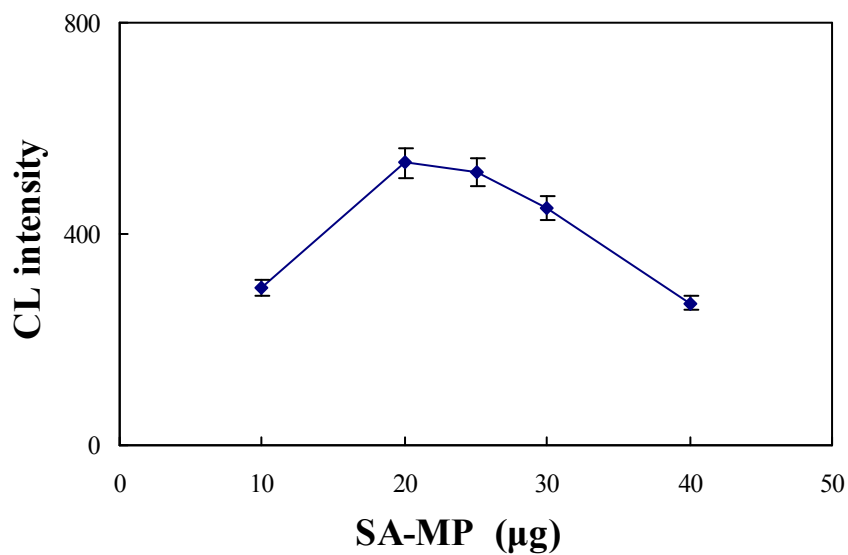

**Figure S1.** CL intensity vs the amount of SA-MPs. Experimental conditions: aMB probe, C1 and C2 sequences were 10, 20 and 30 pmol. 20 mM Mg<sup>2+</sup> ions in BA and 100 fmol let 7a, respectively. The detection procedure was carried out as described in the Experimental section

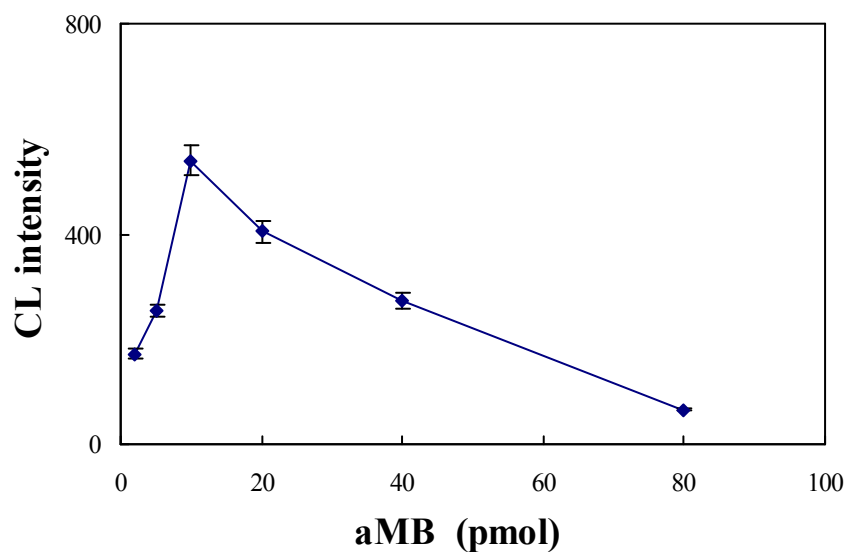

**Figure S2.** CL intensity vs the amount of aMB probes. Experimental conditions: SA-MPs were 20 µg, aMB probe, C1 and C2 sequences were 10, 20 and 30 pmol. 20 mM Mg<sup>2+</sup> ions in BA and 100 fmol let 7a, respectively. The detection procedure was carried out as described in the Experimental section.

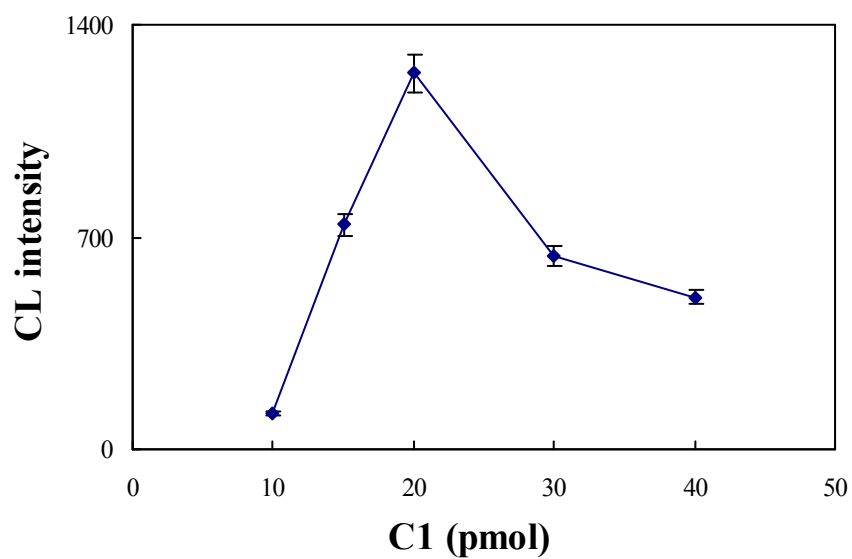

**Figure S3.** CL intensity vs the amount of C1. Experimental conditions: SA-MPs were 20  $\mu\text{g}$ , aMB probe and C2 sequences were 10 and 20 pmol. 20 mM  $\text{Mg}^{2+}$  ions in BA and 100 fmol let 7a, respectively. The detection procedure was carried out as described in the Experimental section.

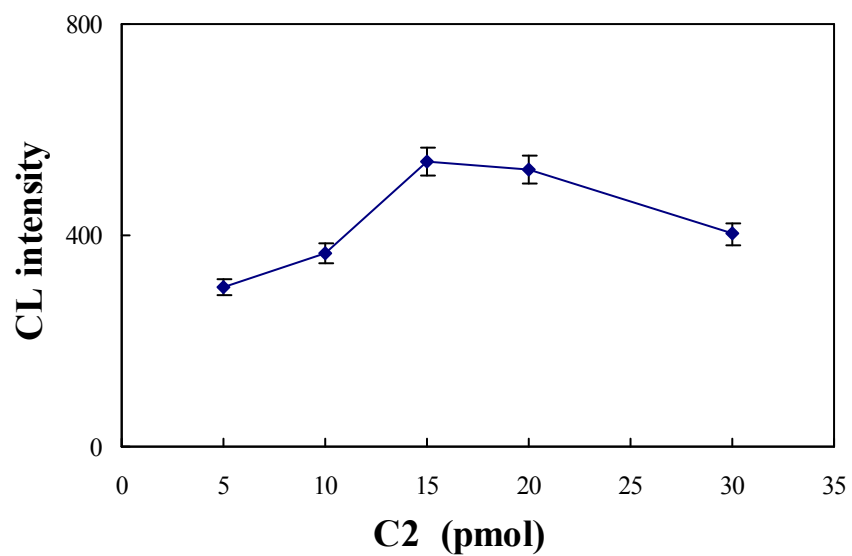

**Figure S4.** CL intensity vs the amount of C2. Experimental conditions: SA-MPs were 20  $\mu\text{g}$ , aMB probe and C1 sequences were 10 and 20 pmol. 20 mM  $\text{Mg}^{2+}$  ions in BA and 100 fmol let 7a, respectively. The detection procedure was carried out as described in the Experimental section.

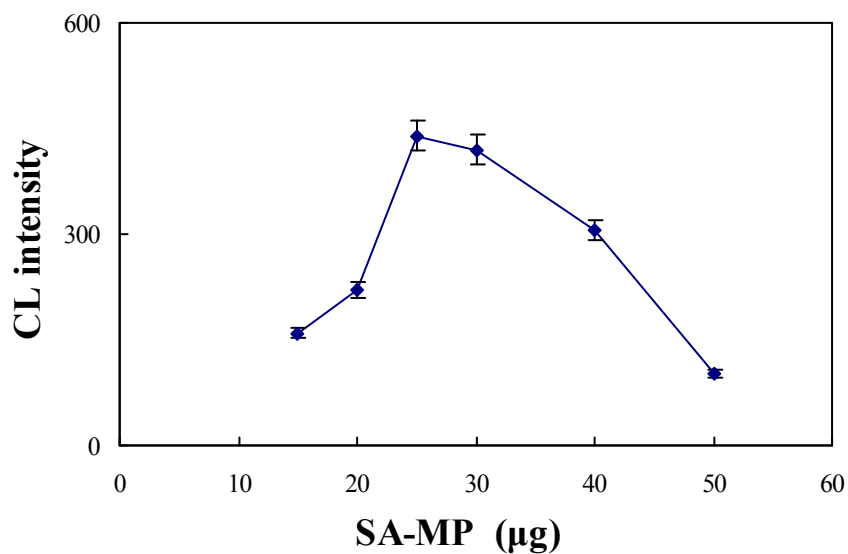

**Figure S5.** CL intensity vs the amount of SA-MPs. Experimental conditions: aMB probe and let 7a were 10 and 1 pmol, respectively. The detection procedure was carried out as described in the Experimental section.

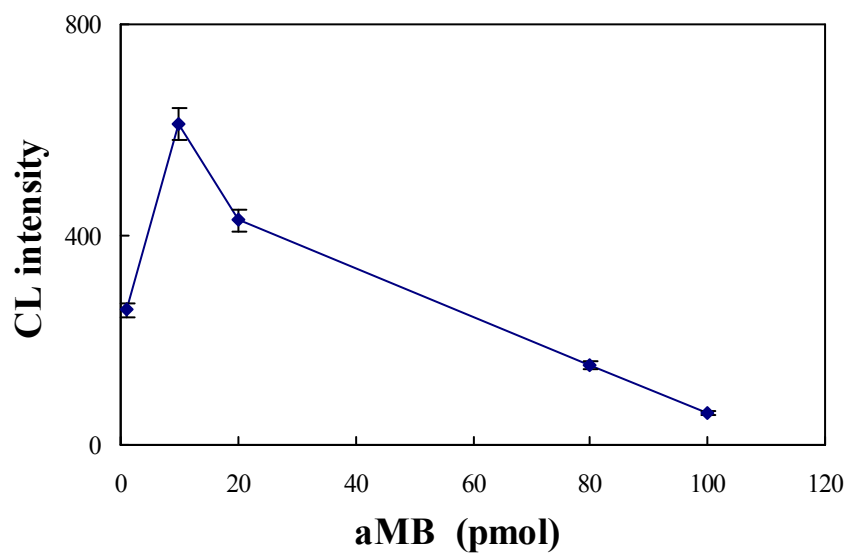

**Figure S6.** CL intensity vs the amount of aMB probes. Experimental conditions: SA-MPs were 20 µg, let 7a was 1 pmol, respectively. The detection procedure was carried out as described in the Experimental section.

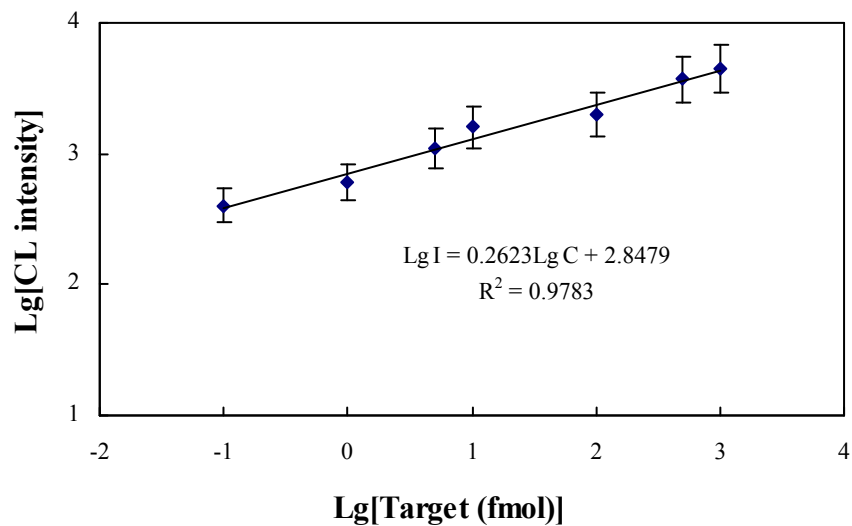

**Figure S7.** Log-Log calibration data for the target miRNA 21. Experimental conditions: SA-MPs were 20  $\mu$ g, hairpin DNA-miRNA 21 switch probe, C1 and C2 sequences were 10, 20 and 20 pmol, 20 mM  $Mg^{2+}$  ions were in BA, respectively. The detection procedure was carried out as described in the Experimental section.

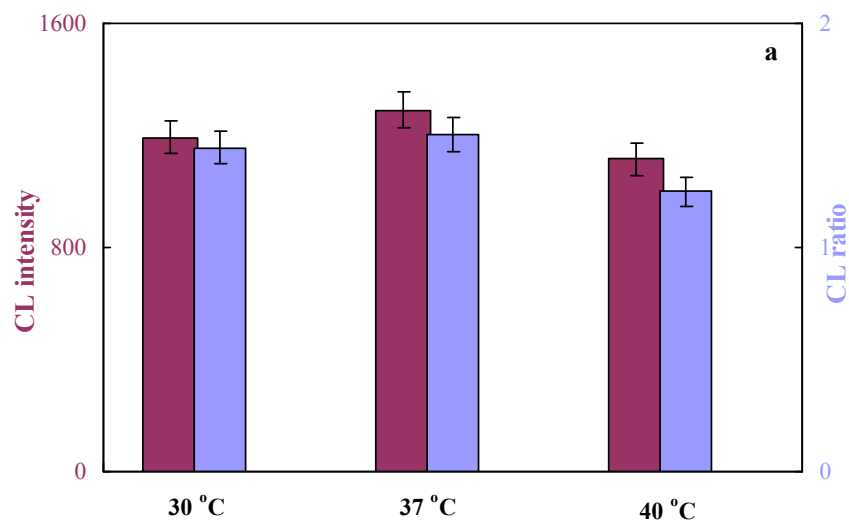

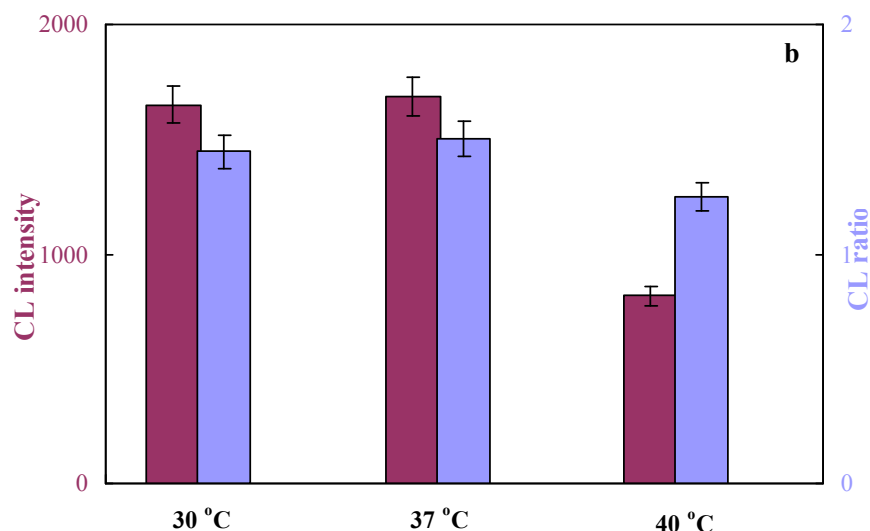

**Figure S8.** CL intensity and CL ratio vs different temperatures for let 7a (a) and miRNA 21 (b). Experimental conditions: SA-MP was 20  $\mu\text{g}$ , both let-7a and miRNA 21 were 100 fmol, hairpin DNA switch probe, C1 and C2 sequences were 10, 20 and 20 pmol, 20 mM  $\text{Mg}^{2+}$  ions were in BA, respectively. The detection procedure was carried out as described in the Experimental section.

**Table S2.** Comparison of sensitivity for different RNA assay methods.

| Analytical method                      | Label                      | target RNA                      | Detection Limit       |
|----------------------------------------|----------------------------|---------------------------------|-----------------------|
| Electrochemical detection              | Alkaline Phosphatase (ALP) | p185 BCR-ABL                    | 1 fM <sup>1</sup>     |
| Fluorescence                           | Poly(dimethylsiloxane)     | Dengue virus                    | 50 pM <sup>2</sup>    |
| Fluorescence                           | SYBR Green I,              | Let-7a                          | 10 fM <sup>3</sup>    |
| Surface plasmon resonance (SPR)        | Label-free                 | miR24, 96, 1, 424               | 10 pM <sup>4</sup>    |
| Fluorescence                           | Cy3                        | Let-7a, miR21, 96, 206, 31      | 10 fM <sup>5</sup>    |
| Silicon photonic microring resonators  | Label-free                 | Let-7a                          | 150 fmol <sup>6</sup> |
| Polyacrylamide gel electrophoresis/ MS | Label-free                 | RNase P, 7SL RNA and U6 snRNA,  | 100 fmol <sup>7</sup> |
| Capillary electrophoresis              | Label-free                 | Nat-siRNAATGB2                  | 35 amol <sup>8</sup>  |
| Colorimetry / Fluorescence             | Methyl / Rhodamine Red     | Genomic RNA                     | 1 pmol <sup>9</sup>   |
| Electrochemical detection              | HRP                        | miRNA-21                        | 60 fmol <sup>10</sup> |
| SPR                                    | Label-free                 | mRNA from <i>L. Innocua iap</i> | 200 pM <sup>11</sup>  |
| SPR imaging                            | Label-free                 | 16S ribosomal RNA               | 20 fmol <sup>12</sup> |
| Nanomechanical detection               | Label-free                 | Messenger RNA of aldolase A     | 10 pM <sup>13</sup>   |
| CL technique (this work)               | Label-free                 | 22 bases RNA                    | 0.1 fmol (1 pM)       |

1. A. C. Lee, Z. Dai, B. Chen, H. Wu, J. Wang, A. Zhang, L. Zhang, T. M. Lim and Y. Lin, *Anal. Chem.*, 2008, **80**, 9402-9410.
2. N. V. Zaytseva, R. A. Montagna and A. J. Baeumner, *Anal. Chem.*, 2005, **77**, 7520-7527.
3. Y. Cheng, X. Zhang, Z. Li, X. Jiao, Y. Wang and Y. Zhang, *Angew. Chem. Int. Ed.*, 2009, **48**, 3268-3272.
4. J. M. Lee, H. Cho and Y. Jung, *Angew. Chem. Int. Ed.*, 2010, **49**, 8662-8665.
5. J. M. Lee and Y. Jung, *Angew. Chem. Int. Ed.*, 2011, **50**, 12487-12490.
6. A. J. Qavi and R. C. Bailey, *Angew. Chem. Int. Ed.*, 2010, **49**, 4608-4611.
7. M. Taoka, M. Ikumi, H. Nakayama, S. Masaki, R. Matsuda, Y. Nobe, Y. Yamauchi, J. Takeda, N. Takahashi and T. Isobe, *Anal. Chem.*, 2010, **82**, 7795-7803.
8. N. Li, C. Jablonowski, H. Jin and W. Zhong, *Anal. Chem.*, 2009, **81**, 4906-4913.
9. H. Li and L. Rothberg, *Anal. Chem.*, 2005, **77**, 6229-6233.
10. H. Yin, Y. Zhou, H. Zhang, X. Meng and S. Ai, *Biosens. Bioelectron.*, 2012, **33**, 247-253.
11. L. G. Carrascosa, S. Gomez-Montes, A. Avino, A. Nadal, M. Pla, R. Eritja and L. M. Lechuga, *Nucleic Acids Res.*, 2012, **40**, e56.
12. B. P. Nelson, M. R. Liles, K. B. Frederick, R. M. Corn and R. M. Goodman, *Environ. Microbiol.*, 2002, **4**, 735-743.
13. J. Zhang, H. P. Lang, F. Huber, A. Bietsch, W. Grange, U. Certa, R. McKendry, H. J. Guntherodt, M. Hegner and C. Gerber, *Nature Nanotechnology* 2006, **1**, 214-220.
